# Supplementary material
Source: Springer Nature journal article supplement (https://www.springermedizin.de/resource/supplementary/12961_2012_232_MOESM1_ESM.pdf/9570856)

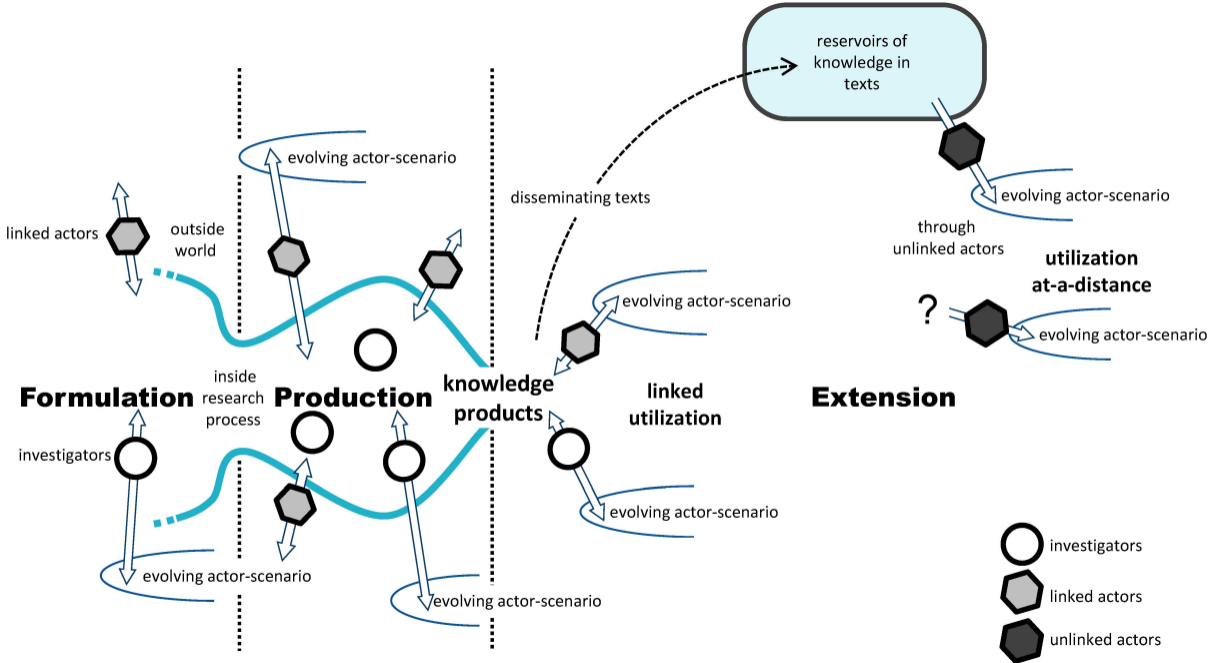

Supplement: MOESM1 [file 9570856]
